# Supplementary material for: Interaction of nutritional status and diabetes on active and latent tuberculosis: a cross-sectional analysis
Source: BMC Infect Dis. 2019 Jul 16;19:627. doi: 10.1186/s12879-019-4244-4 (PMC6636094; doi:10.1186/s12879-019-4244-4)
Supplement: Supplementary file 1 — Table S1. and Table S2. for adjusted prevalence ratios and difference of latent TB infection by BMI and diabetes status. (DOCX 18 kb) [file 12879_2019_4244_MOESM1_ESM.docx]

**Interaction of nutritional status and diabetes on active and latent tuberculosis**

Rachel W. Kubiak, Sonali Sarkar, C. Robert Horsburgh, Jr., Gautam Roy, Mario Kratz, Ayiraveetil Reshma, Selby Knudsen, Padmini Salgame,Jerrold J. Ellner, Paul K. Drain and Natasha S. Hochberg.

Additional file 1: Tables S1 and S2

**Table S1. Relative scale for effect modification of diabetes on latent tuberculosis infection prevalence by body mass index category in south Indiaa**

|  | **BMI Category** | | | | | | | | | | | | | |
| --- | --- | --- | --- | --- | --- | --- | --- | --- | --- | --- | --- | --- | --- | --- |
|  | **<18.5** | | | |  | **18.5-22.9** | | | |  | **≥23** | | | |
|  | **LTBI/Total** | **%** | **aPR** | **95% CI** |  | **LTBI/Total** | **%** | **aPR** | **95% CI** |  | **LTBI/Total** | **%** | **aPR** | **95% CI** |
| No history of diabetes | 103/180 | 57.2 | 1.18 | 0.99, 1.40 |  | 180/375 | 48.0 | **1.00** | **Referent** |  | 278/489 | 56.9 | 1.12 | 0.99, 1.27 |
| Prior diabetes diagnosis | 2/2 | 100 | 1.55 | 1.13, 2.12 |  | 7/12 | 58.3 | 1.04 | 0.62, 1.76 |  | 35/55 | 63.6 | 1.24 | 0.97, 1.58 |
| Effect of diabetes within strata of BMI |  |  | 1.97 | 1.32, 2.93 |  |  |  | 1.04 | 0.62, 1.76 |  |  |  | 1.14 | 0.90, 1.43 |

aPR, adjusted prevalence ratio; BMI, body mass index; CI, confidence interval; LTBI, latent tuberculosis infection.

*P* for interaction 0.109

a Adjusted for age and sex, and accounting for clustering at the family-level with an exchangeable correlation matrix.

**Table S2. Additive scale for effect modification of diabetes on latent tuberculosis infection prevalence by body mass index category in south Indiaa**

|  | **BMI Category** | | | | | | | | | | | | | |
| --- | --- | --- | --- | --- | --- | --- | --- | --- | --- | --- | --- | --- | --- | --- |
|  | **<18.5** | | | |  | **18.5-22.9** | | | |  | **≥23** | | | |
|  | **LTBI/Total** | **%** | **aPD** | **95% CI** |  | **LTBI/Total** | **%** | **aPD** | **95% CI** |  | **LTBI/Total** | **%** | **aPD** | **95% CI** |
| No history of diabetes | 103/180 | 57.2 | 0.09 | 0.00, 0.19 |  | 180/375 | 48.0 | **0.00** | **Referent** |  | 278/489 | 56.9 | 0.05 | -0.01, 0.11 |
| Prior diabetes diagnosis | 2/2 | 100 | 0.36 | 0.19, 0.53 |  | 7/12 | 58.3 | 0.03 | -0.26, 0.32 |  | 35/55 | 63.6 | 0.12 | -0.03, 0.27 |
| Effect of diabetes within strata of BMI |  |  | 0.49 | 0.27, 0.70 |  |  |  | 0.03 | -0.26, 0.32 |  |  |  | 0.10 | -0.04, 0.24 |

aPD, adjusted prevalence difference; BMI, body mass index; CI, confidence interval; LTBI, latent tuberculosis infection.

*P* for interaction 0.119

a Adjusted for age and sex, and accounting for clustering at the family-level with an exchangeable correlation matrix.
